# Supplementary material for: Ferroelectric-enabled significant carbon dioxide molecular adsorption on BaTiO 3 (001)
Source: Royal Society of Chemistry journal article supplement (doi:10.1039/d4ma00856a), 2024-01-01
Supplement: d4ma00856a1.xlsx [file d4ma00856a1.xlsx]

## Sheet: Sheet1
			Correction factors Voigt O 1s
				1.0012	1.02085	1						Element	CS390 eV	beta	1+beta	CS modif.						Element	CS650eV	beta	1+beta	CS modif.
				0.998101	1.00646	1.0024						Ba 4d	0.8775	0.8268	1.8268	1.60302						O 1s	0.3383	2	3	1.0149
				1.01112	1.04939	1						C 1s	0.4929	2	3	1.4787						Ti 2p	0.9937	1.353	2.353	2.33818
				1.0204	1.0548	1.08658																C 1s	0.13625	2	3	0.40875
				1.01499	1.05805	1																Ba 4d	0.4604	1.2075	2.2075	1.01633
				1.06817	1.15224	1.16274
				1.03084	1.09458	1
				1.06717	1.14815	1.14732
				1.03809	1.11445	1
				1.04984	1.10841	1.07138
			Composition analysis
			650 eV																											rescaled to 'perfect' initial composition
				Ba1	Ba2	Ba_CSm	Ba1mod	Ba2mod		Ti	Ti_CSm	Timod	BR	TimodBR	Ba1mod:Timod	O1	O2	O3	O_CSm	O1mod	O2mod	O3mod		O2:Ba2	O1:Ba1	(O1+O2-Ba2):Ba1	(O1+O2-Ba2):TimodBR	Ba1:TimodBR		(O1+O2-Ba2):Ba1	(O1+O2-Ba2):TimodBR	Ba1:TimodBR		O1:(Ba1+Ti)
			clean1	1080.48	610.493	1.01633	1063.12	600.682		1630.99	2.33818	697.548	1.47823	844.41	1.52408	1506.24	952.98	0	1.0149	1485.91	958.567	0	clean1	1.5958	1.39769	1.73433	2.18353	1.25901		3.03882	3.39328	1.11664		0.778972
			CO1	990.136	651.945	1.01633	974.224	641.468		1187.34	2.33818	507.806	1.51431	605.9	1.9185	1360.6	1194.41	145.39	1.0149	1338.08	1184.47	143.599	CO1	1.84651	1.37348	1.93085	3.10461	1.6079		3.38316	4.82467	1.42608		0.846817
			clean2	1159.63	656.758	1.01633	1141	646.203		1649.23	2.33818	705.347	1.44962	863.825	1.61764	1543.88	812.627	0	1.0149	1538.13	840.244	0	clean2	1.30028	1.34806	1.51812	2.00523	1.32087		2.65999	3.1162	1.17151		0.767216
			CO2	1059.21	634.917	1.01633	1042.19	624.713		1373.02	2.33818	587.218	1.51247	701.164	1.7748	1528.18	1026.87	79.5041	1.0149	1536.46	1067.24	85.1193	CO2	1.70836	1.47425	1.89886	2.82242	1.48637		3.32711	4.38614	1.3183		0.881321
			clean3	1169	658.697	1.01633	1150.21	648.112		1629.1	2.33818	696.74	1.46565	847.735	1.65084	1563.95	788.934	0	1.0149	1564.09	822.477	0	clean3	1.26904	1.35983	1.51143	2.05071	1.3568		2.64826	3.18687	1.20338		0.782851
			CO3	1161.23	673.599	1.01633	1142.56	662.774		1551.93	2.33818	663.735	1.49093	799.381	1.72142	1653.76	789.345	33.6226	1.0149	1740.57	896.162	38.5204	CO3	1.35214	1.52339	1.72765	2.46935	1.42931		3.02712	3.83746	1.26769		0.8963
			clean4	1201.05	671.365	1.01633	1181.74	660.576		1673.94	2.33818	715.916	1.45256	875.717	1.65067	1569.45	782.452	0	1.0149	1594.1	843.882	0	clean4	1.27749	1.34894	1.50405	2.02966	1.34946		2.63534	3.15416	1.19687		0.774791
			CO4	1161.49	652.779	1.01633	1142.83	642.288		1534.94	2.33818	656.469	1.47927	794.35	1.74087	1647.11	796.561	28.8179	1.0149	1731.94	901.145	32.5779	CO4	1.40302	1.51549	1.742	2.5062	1.43869		3.05225	3.89472	1.27601		0.894055
			clean5	1051.45	594.533	1.01633	1034.56	584.979		1650.94	2.33818	706.082	1.44407	866.688	1.46521	1506.08	747.044	0	1.0149	1540.49	820.32	0	clean5	1.40231	1.48903	1.71652	2.04899	1.19369		3.00761	3.18419	1.05871		0.810254
			CO5	1004.59	597.991	1.01633	988.444	588.381		1324.61	2.33818	566.512	1.53225	671.158	1.74479	1427.85	954.054	46.1357	1.0149	1477.01	1041.96	48.7032	CO5	1.77089	1.49428	1.95316	2.8765	1.47274		3.42224	4.47018	1.30621		0.889979
																															????
			390 eV
				Ba1	Ba2	Ba_CSm	Ba1mod	Ba2mod		C1	C2	C3	Ctotal	C_CSm	Ctotalmod		Ctotalmod:Ba2				C1mod	C2mod	C3mod
			clean1	1729.31	1534.24	1.60302	1078.78	957.098		0	0	0	0	1.4787	0		0		clean1		0	0	0	0
			CO1	1375.24	1739.41	1.60302	857.904	1085.08		543.536	82.0271	25.7561	651.319	1.4787	440.467		0.40593		CO1		367.577	55.4724	17.4181	440.467
			clean2	2068.22	1898.64	1.60302	1290.2	1184.42		0	0	0	0	1.4787	0		0		clean2		0	0	0	0
			CO2	1730.79	1621.2	1.60302	1079.71	1011.34		372.703	44.0165	39.9096	456.629	1.4787	308.805		0.305341		CO2		252.048	29.767	26.9896	308.805
			clean3	2055.97	1853.87	1.60302	1282.56	1156.49		0	0	0	0	1.4787	0		0		clean3		0	0	0	0
			CO3	2013.49	1838.71	1.60302	1256.06	1147.03		333.662	8.44345	31.6239	373.729	1.4787	252.742		0.220345		CO3		225.646	5.71005	21.3863	252.742
			clean4	2107.75	1903.69	1.60302	1314.86	1187.57		0	0	0	0	1.4787	0		0		clean4		0	0	0	0
			CO4	1988.78	1808.15	1.60302	1240.65	1127.96		295.067	2.43306	28.0767	325.577	1.4787	220.178		0.195199		CO4		199.545	1.64541	18.9874	220.178
			clean5	1689.27	1495.32	1.60302	1053.81	932.816		0	0	0	0	1.4787	0		0		clean5		0	0	0	0
			CO5	1629.63	1517.48	1.60302	1016.6	946.641		341.85	22.4722	33.7469	398.069	1.4787	269.202		0.284376		CO5		231.183	15.1973	22.822	269.202

## Sheet: Sheet3
						650 eV	cBa1	0.590148
							cBa2	0.784644
							cTi	0.76477
							fO (clean)	0.744759
							Comp	1.45399
							fO for CO	0.279
						390 eV	cBa2'	0.3323
		650 eV
			Ba1mod	Ba2mod	TimodBR	O1mod	O2mod	O3mod	(O:Ba)surf	Comp.bulk	(Ba:Ti)bulk	(O3:Ba)surf
		clean1	1063.12	600.682	844.41	1485.91	958.567	0	1.28903	1.44279	0.971534	0
		CO1	974.224	641.468	605.9	1338.08	1184.47	143.599	2.0743	1.42395	1.24076	0.285302
		clean2	1141	646.203	863.825	1538.13	840.244	0	0.912396	1.43611	1.01927	0
		CO2	1042.19	624.713	701.164	1536.46	1067.24	85.1193	1.89824	1.45336	1.14699	0.17365
		clean3	1150.21	648.112	847.735	1564.09	822.477	0	0.872581	1.46395	1.047	0
		CO3	1142.56	662.774	799.381	1740.57	896.162	38.5204	1.44425	1.46672	1.10295	0.0740718
		clean4	1181.74	660.576	875.717	1594.1	843.882	0	0.88336	1.44838	1.04133	0
		CO4	1142.83	642.288	794.35	1731.94	901.145	32.5779	1.04334	1.46073	1.11019	0.0646428
		clean5	1034.56	584.979	866.688	1540.49	820.32	0	1.04243	1.47824	0.921131	0
		CO5	988.444	588.381	671.158	1477.01	1041.96	48.7032	1.97793	1.46435	1.13647	0.105494
									average clean	1.4539
		390 eV							average CO	1.45382
			Ba1mod	Ba2mod	C1mod	C2mod	C3mod	(C2:Ba)surf	(O3:C2)surf	(C1:Ba)surf 390 eV	(O2:Ba2)surf 650 eV	(O2:C1) derived
		clean1	1078.78	957.098	0	0	0	0		0	1.28903
		CO1	857.904	1085.08	367.577	55.4724	17.4181	0.153845	1.85448	1.01942	2.0743	2.03478
		clean2	1290.2	1184.42	0	0	0	0		0	0.912396
		CO2	1079.71	1011.34	252.048	29.767	26.9896	0.088574	1.96051	0.749987	1.89824	2.53103
		clean3	1282.56	1156.49	0	0	0	0		0	0.872581
		CO3	1256.06	1147.03	225.646	5.71005	21.3863	0.0149808	4.94445	0.592001	1.44425	2.43961
		clean4	1314.86	1187.57	0	0	0	0		0	0.88336
		CO4	1240.65	1127.96	199.545	1.64541	18.9874	0.00438983	14.7256	0.532372	1.04334	1.9598
		clean5	1053.81	932.816	0	0	0	0		0	1.04243
		CO5	1016.6	946.641	231.183	15.1973	22.822	0.0483114	2.18361	0.734919	1.97793	2.69136
								should be 2	1.99953			2.33132
